# Supplementary material for: Pathogenic variants in the AFG3L2 proteolytic domain cause SCA28 through haploinsufficiency and proteostatic stress-driven OMA1 activation
Source: PubMed Central journal article supplement — J Med Genet. 2019 Mar 25;56(8):499–511. doi: 10.1136/jmedgenet-2018-105766 (PMC6678042; doi:10.1136/jmedgenet-2018-105766), 2019-03-25

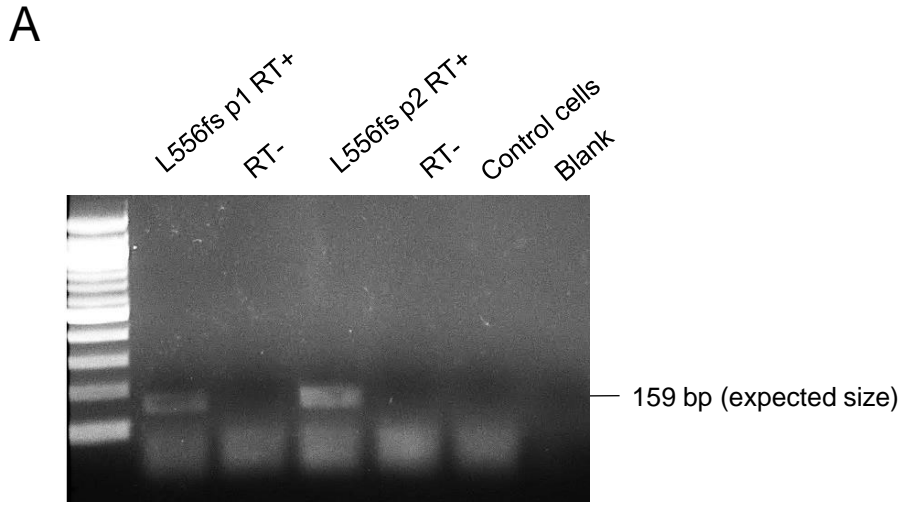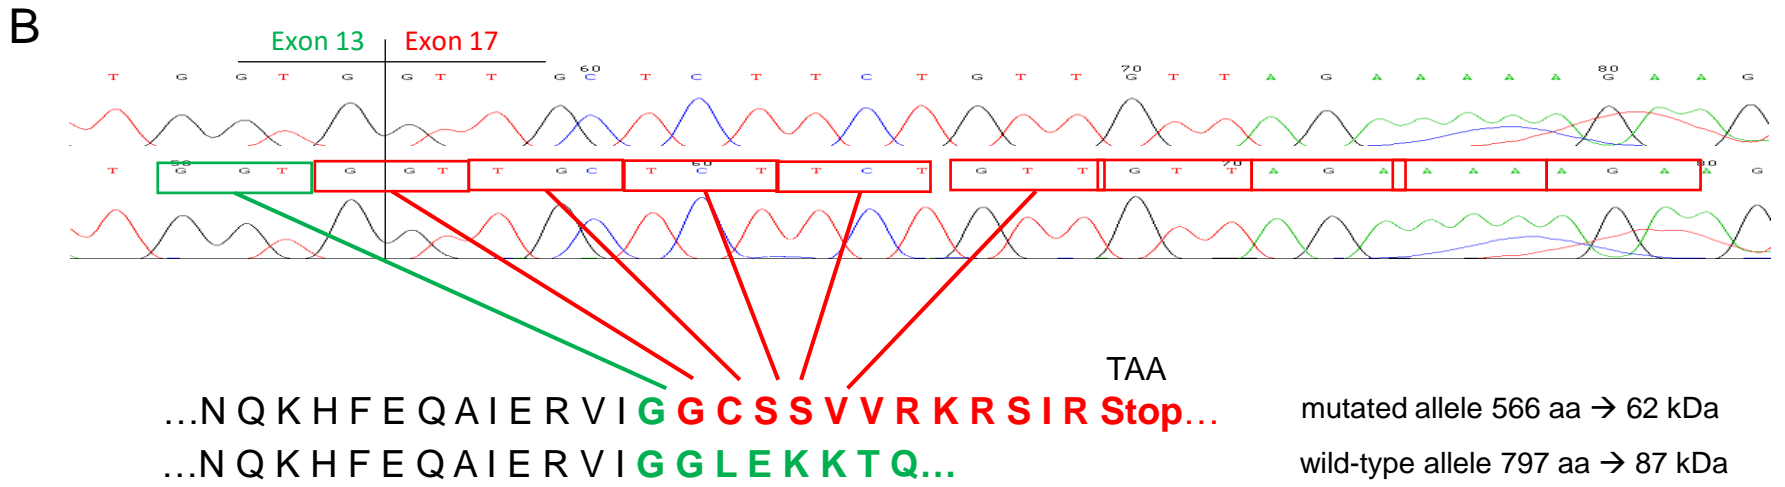

A

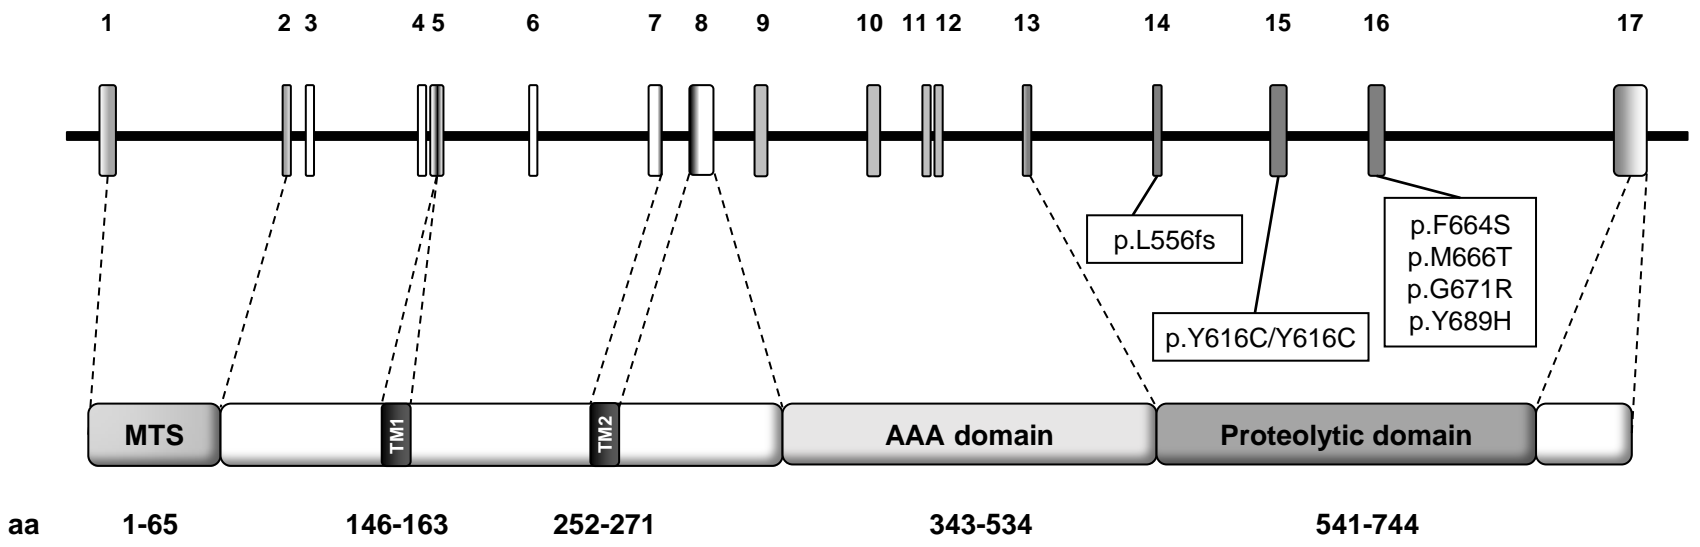

B

|                |     |   |   |   |   |   |   |          |   |   |   |   |     |   |   |     |   |   |   |   |   |   |   |   |   |          |          |          |   |   |   |   |          |   |   |   |   |   |   |   |   |   |   |   |   |   |   |   |   |   |   |          |          |   |     |
|----------------|-----|---|---|---|---|---|---|----------|---|---|---|---|-----|---|---|-----|---|---|---|---|---|---|---|---|---|----------|----------|----------|---|---|---|---|----------|---|---|---|---|---|---|---|---|---|---|---|---|---|---|---|---|---|---|----------|----------|---|-----|
| H. sap. AFG3L2 | 610 | P | K | E | Q | Y | L | <b>Y</b> | T | K | E | Q | ... | / | / | ... | Q | S | A | Y | A | Q | I | V | Q | <b>F</b> | <b>G</b> | <b>M</b> | N | E | K | V | <b>G</b> | Q | I | S | F | D | L | P | R | Q | G | D | M | - | - | V | L | E | K | P        | <b>Y</b> | S | 690 |
| R. nor. Afg3l2 | 609 | P | K | E | Q | Y | L | <b>Y</b> | T | K | E | Q | ... | / | / | ... | Q | S | A | Y | A | Q | I | V | Q | <b>F</b> | <b>G</b> | <b>M</b> | N | E | K | V | <b>G</b> | Q | I | S | F | D | L | P | R | Q | G | D | M | - | - | V | L | E | K | P        | <b>Y</b> | S | 689 |
| M. mus. Afg3l2 | 609 | P | K | E | Q | Y | L | <b>Y</b> | T | K | E | Q | ... | / | / | ... | Q | S | A | Y | A | Q | I | V | Q | <b>F</b> | <b>G</b> | <b>M</b> | N | E | K | V | <b>G</b> | Q | I | S | F | D | L | P | R | Q | G | D | M | - | - | V | L | E | K | P        | <b>Y</b> | S | 689 |
| D. mel. Afg3l2 | 499 | P | K | D | H | Y | L | L        | S | K | E | Q | ... | / | / | ... | D | I | A | Y | S | Q | V | V | R | <b>F</b> | <b>G</b> | <b>M</b> | N | E | K | V | <b>G</b> | Q | V | S | F | D | V | G | Q | A | G | D | P | - | - | V | F | S | K | P        | <b>Y</b> | S | 579 |
| X. tro. Afg3l2 | 612 | P | K | E | Q | Y | L | <b>Y</b> | T | K | E | Q | ... | / | / | ... | Q | S | A | Y | A | Q | I | V | Q | <b>F</b> | <b>G</b> | <b>M</b> | N | E | K | V | <b>G</b> | Q | V | S | F | D | L | P | R | Q | G | D | M | - | - | V | L | E | K | P        | <b>Y</b> | S | 692 |
| D. rer. Afg3l2 | 605 | P | K | E | Q | Y | L | <b>Y</b> | T | K | E | Q | ... | / | / | ... | Q | S | A | Y | A | Q | I | V | Q | <b>F</b> | <b>G</b> | <b>M</b> | N | E | K | V | <b>G</b> | Q | V | S | F | D | L | P | R | Q | G | E | L | - | - | V | L | E | K | P        | <b>Y</b> | S | 675 |
| S. cer. Yta10  | 595 | P | P | D | Q | Y | L | I        | S | E | E | Q | ... | / | / | ... | Q | M | A | N | A | M | V | T | S | L        | G        | <b>M</b> | S | P | K | I | <b>G</b> | Y | L | S | F | D | Q | N | - | D | G | N | F | - | - | K | V | N | K | P        | <b>F</b> | S | 675 |
| T. the. FtsH   | 654 | R | E | D | M | L | H | W        | S | R | K | R | ... | / | / | ... | E | L | A | R | R | M | I | T | E | W        | G        | <b>M</b> | H | P | E | F | <b>G</b> | P | V | A | Y | A | V | R | E | D | T | Y | L | G | G | Y | D | V | R | <b>Q</b> | <b>Y</b> | S | 537 |

C

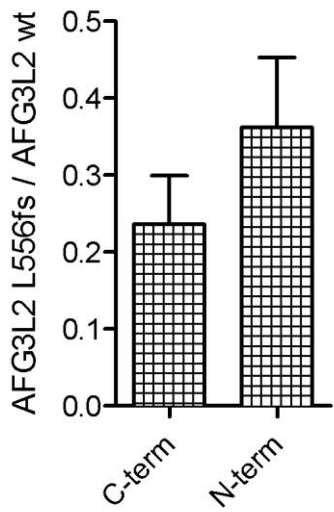

D

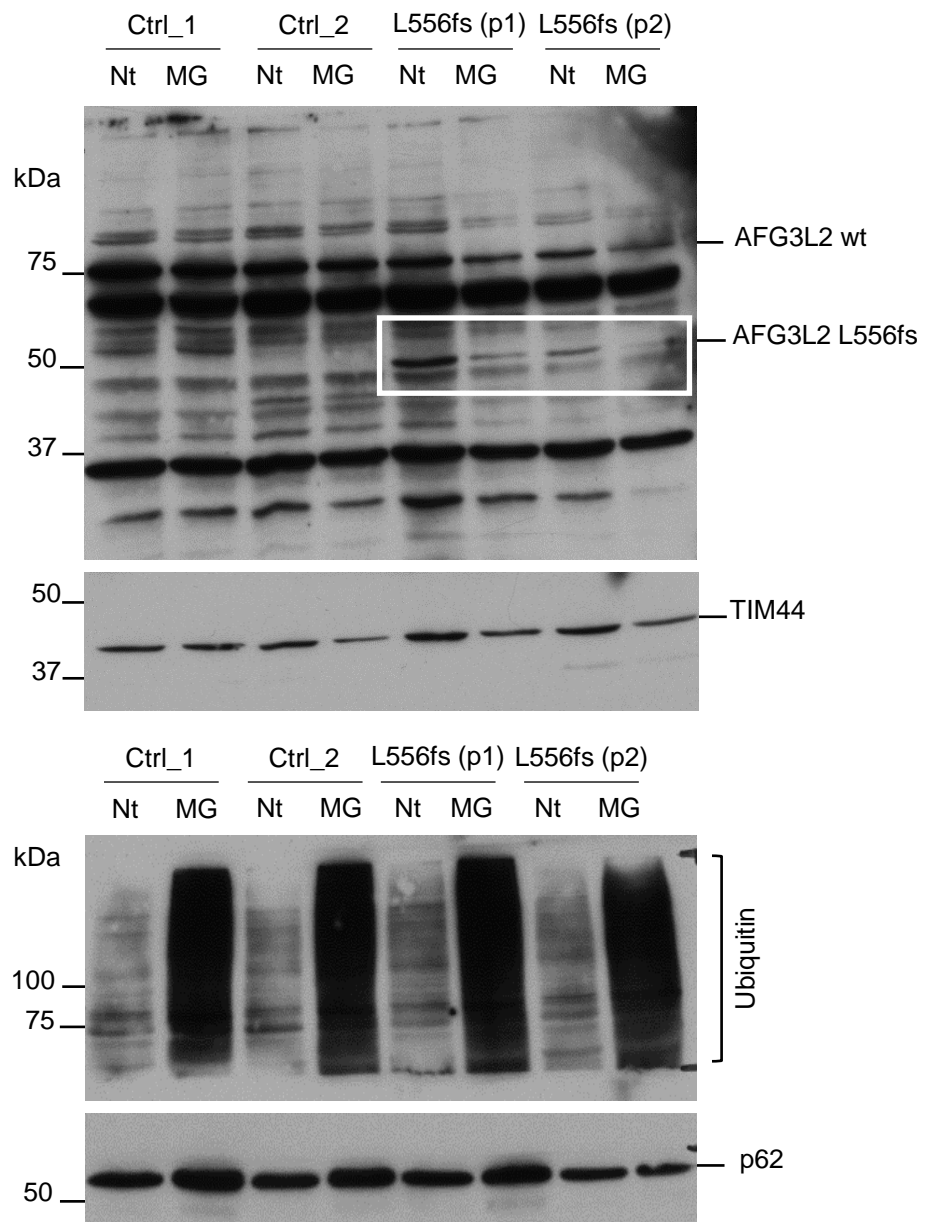

A

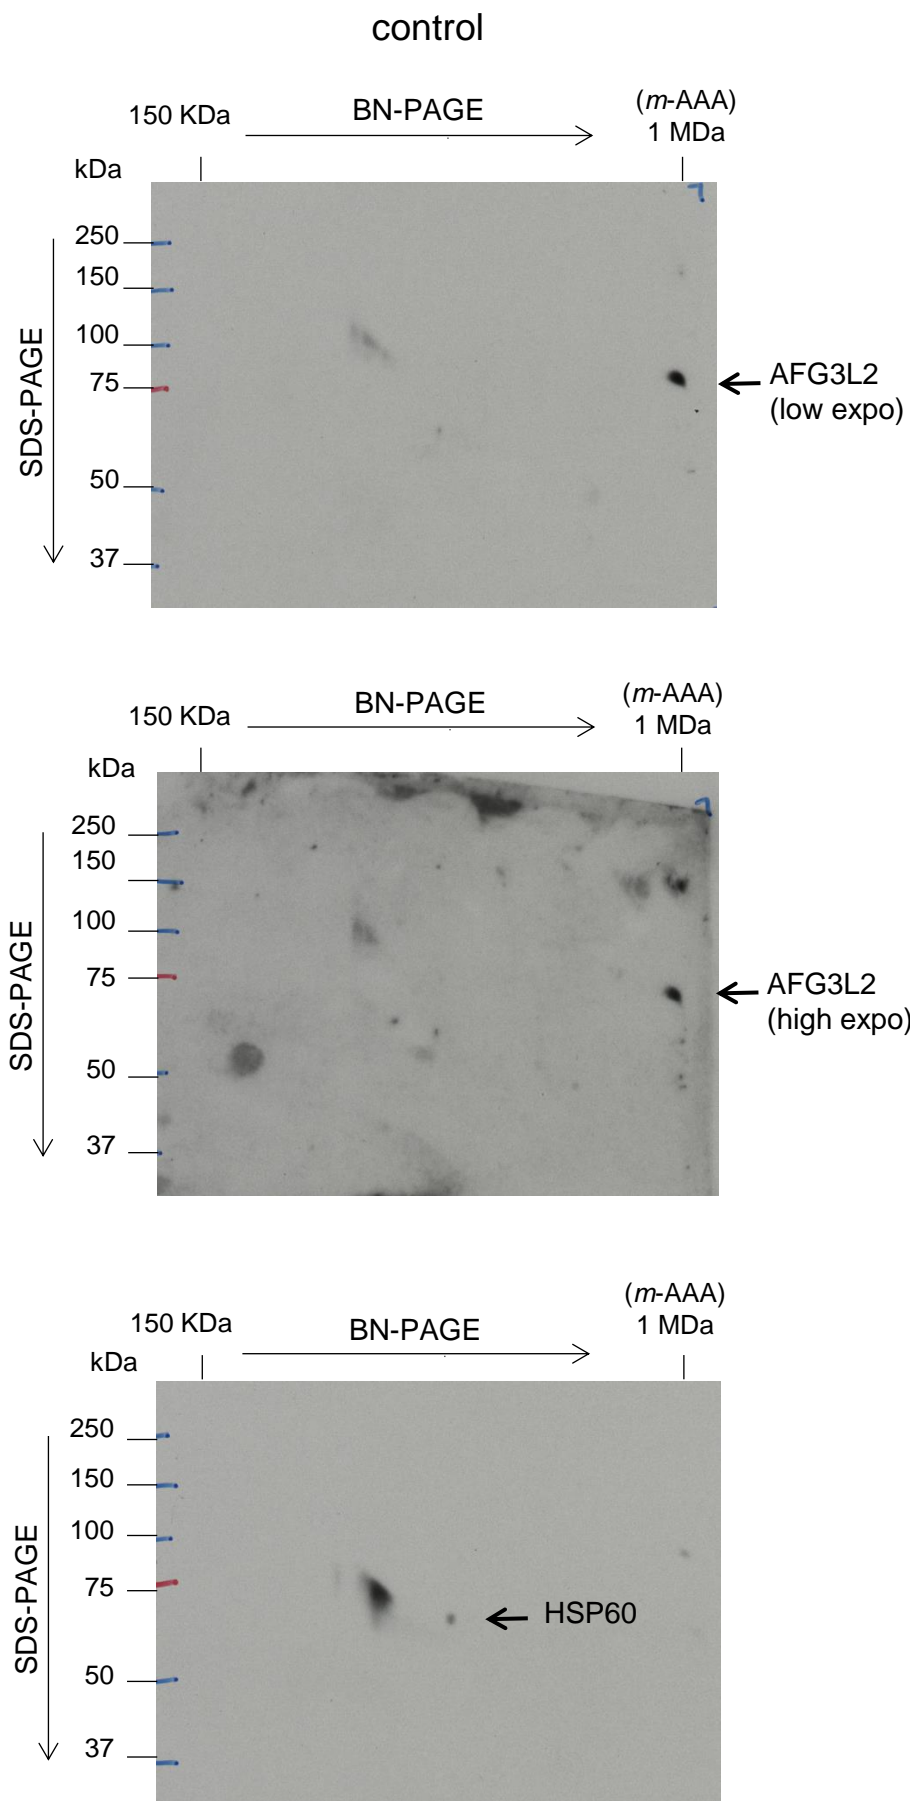

B

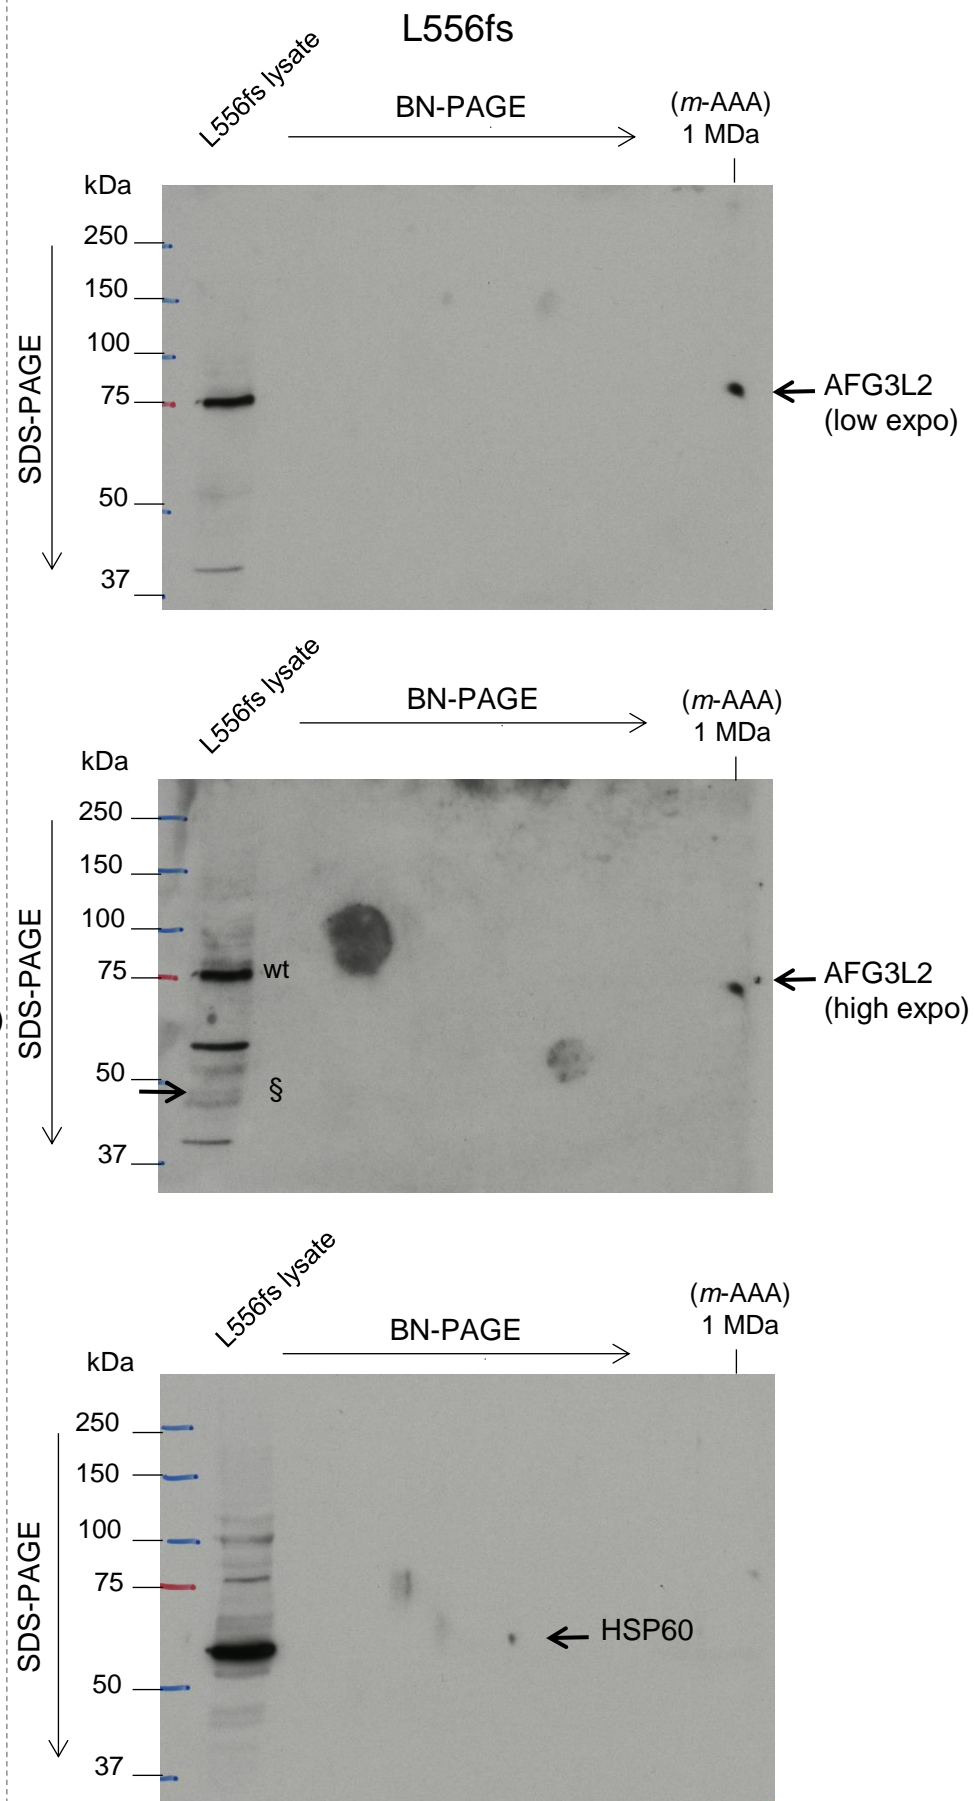

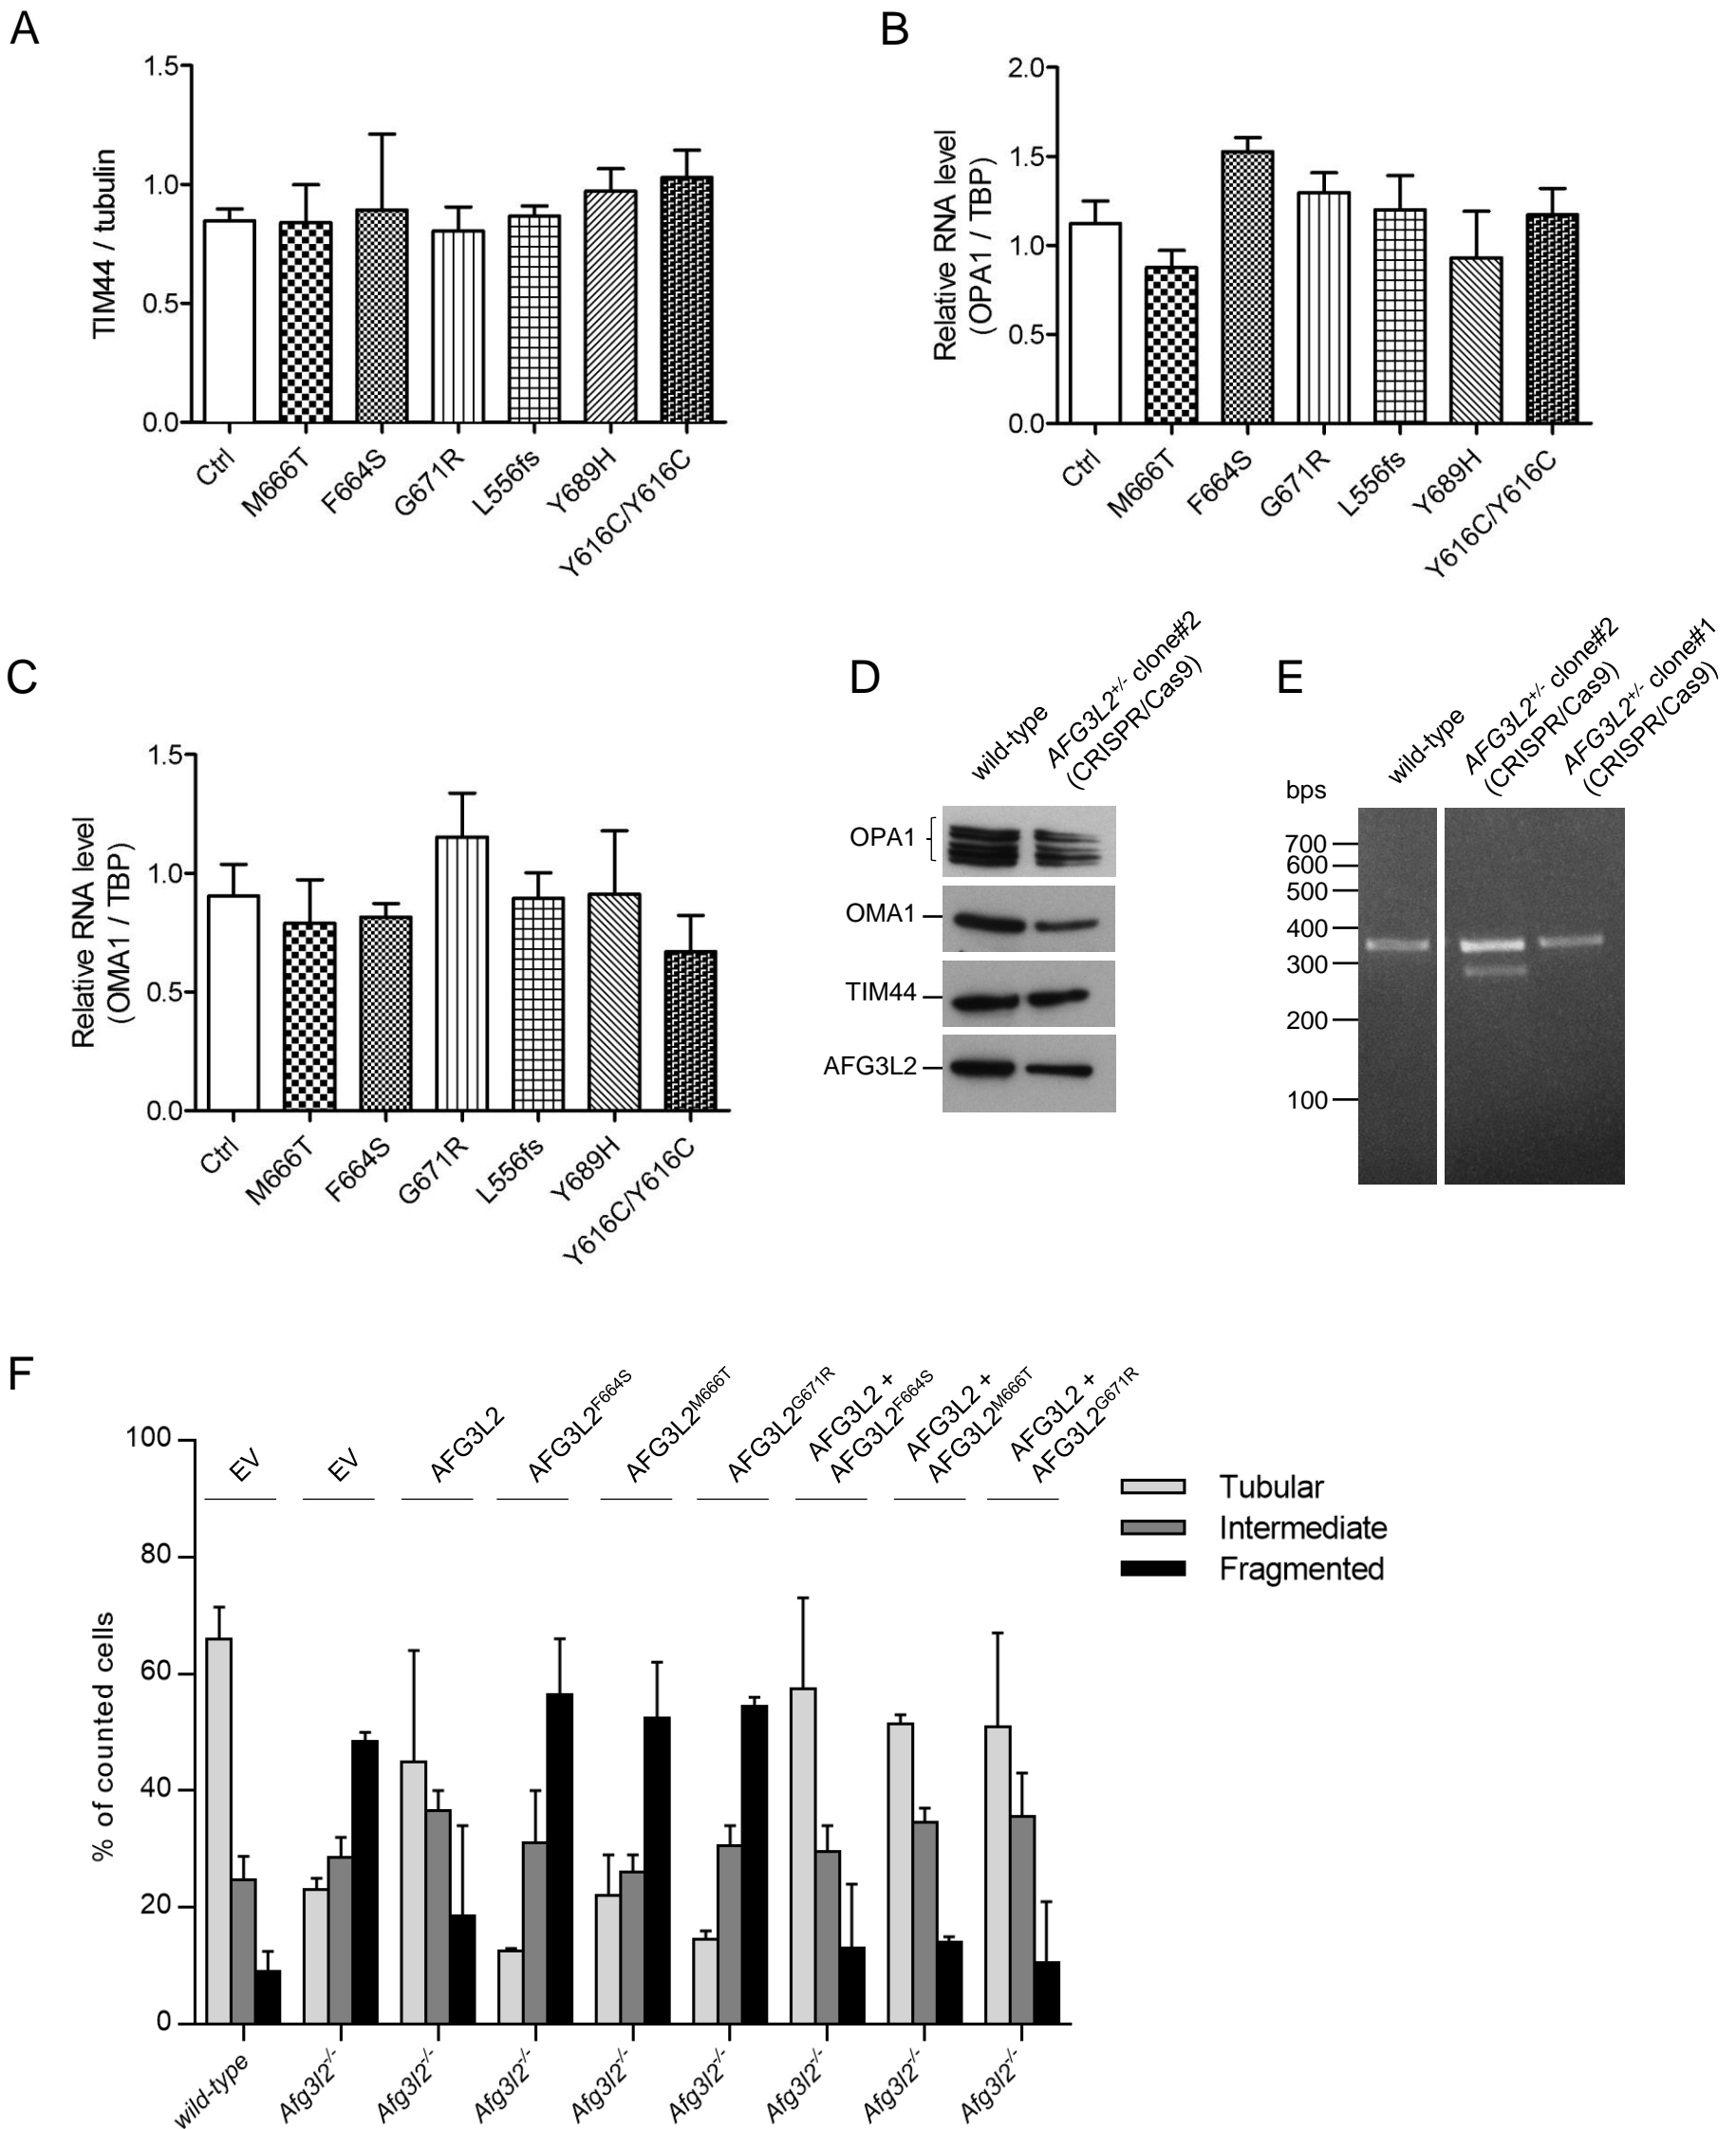

A

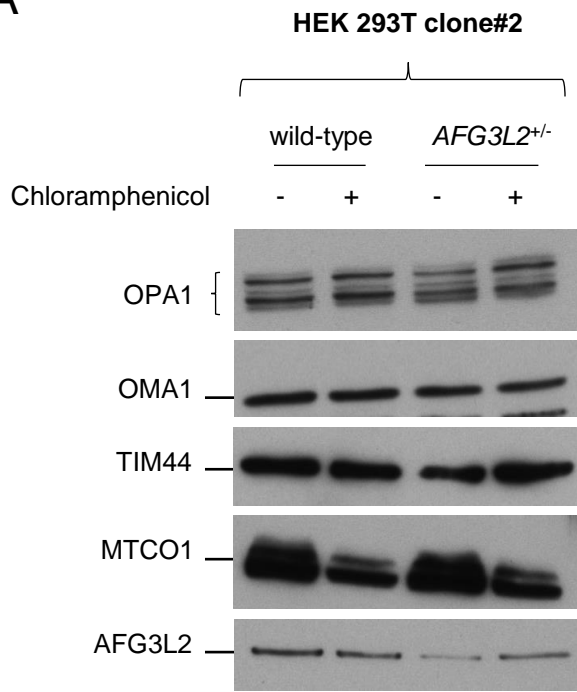

B

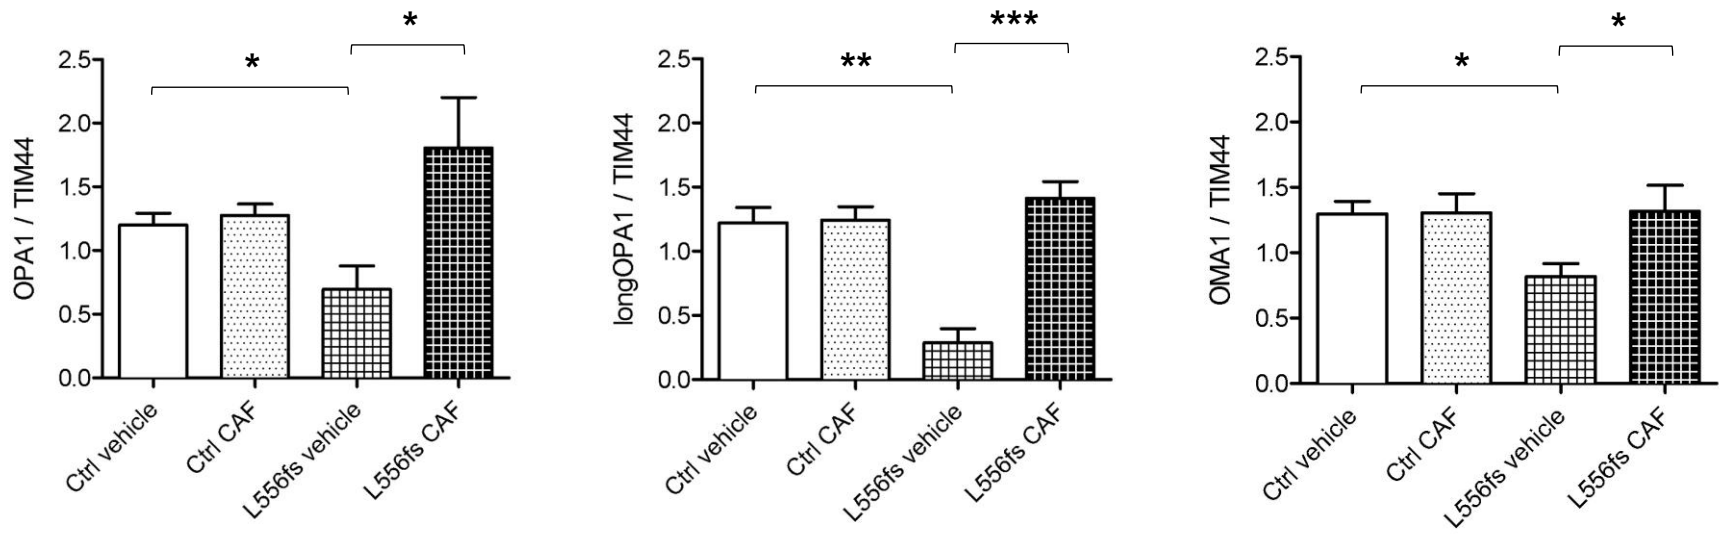

C

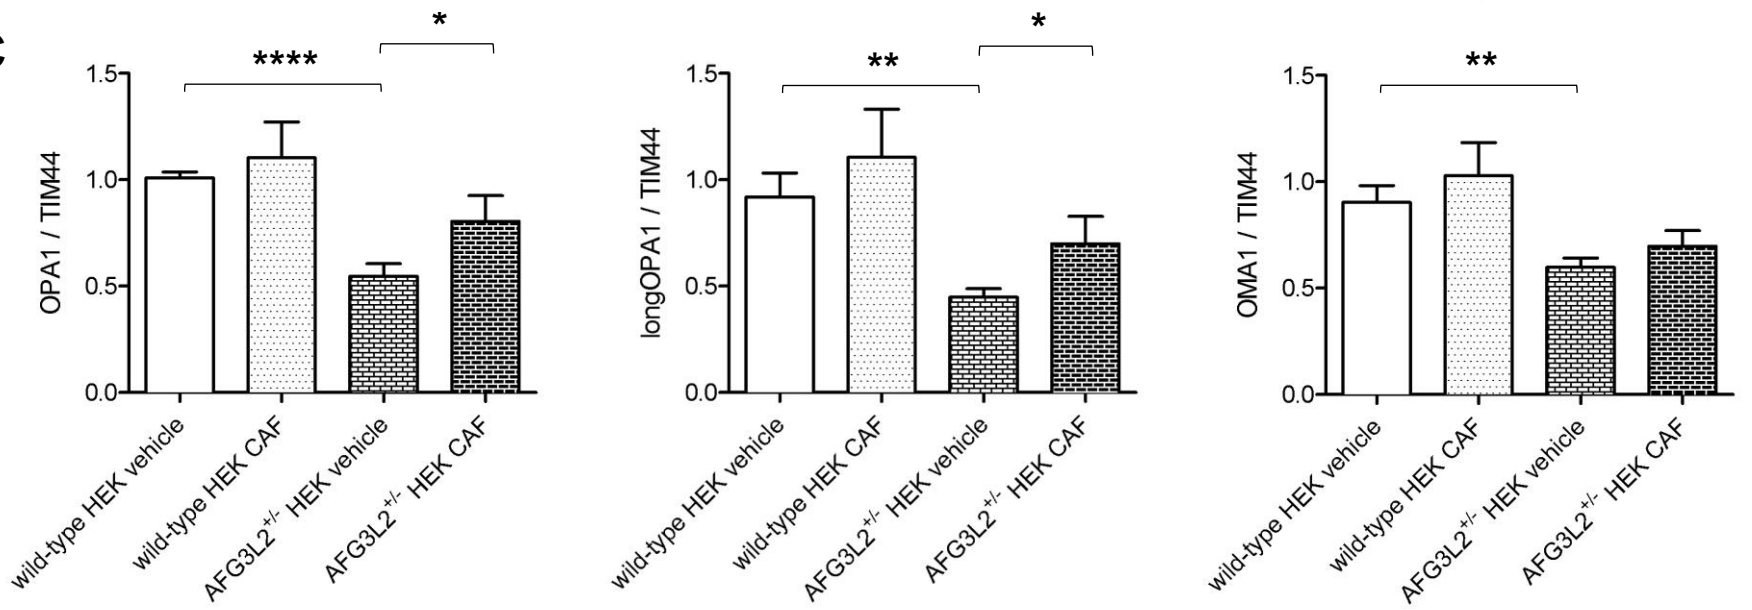

D

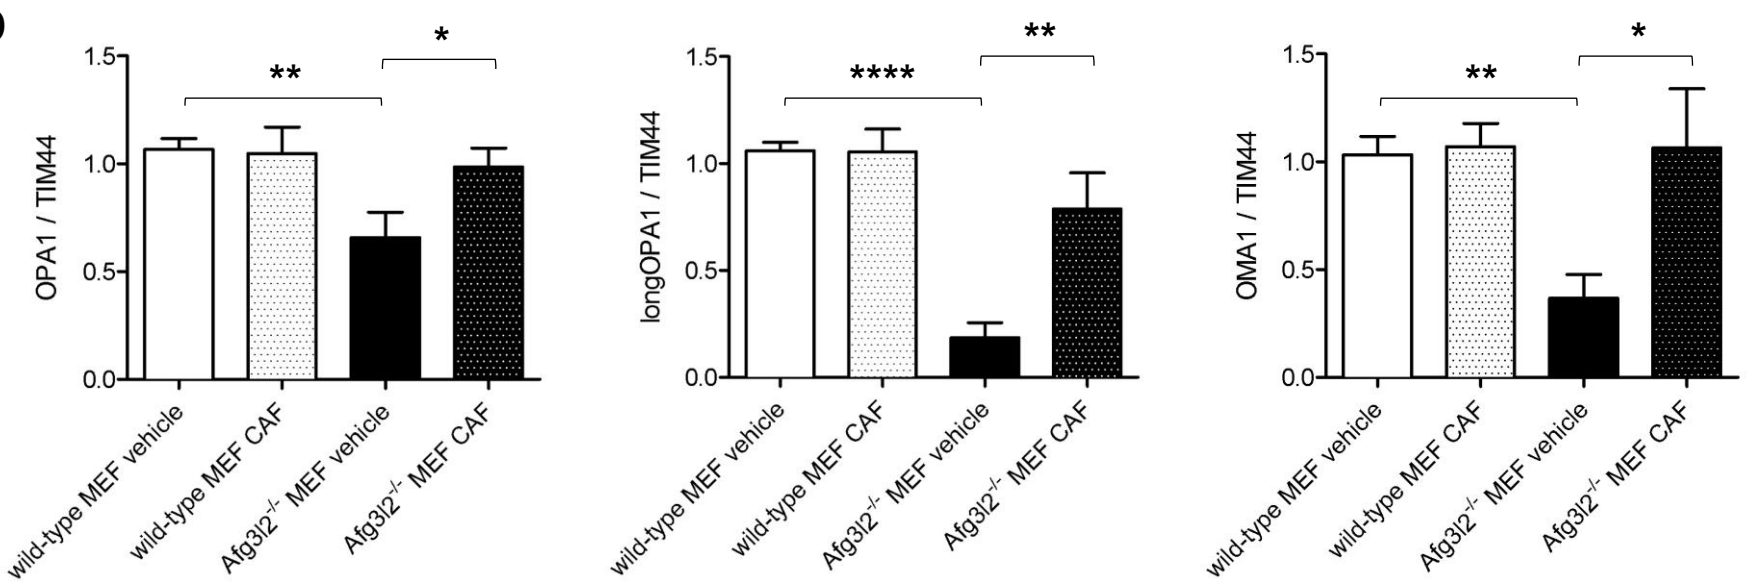

**A**

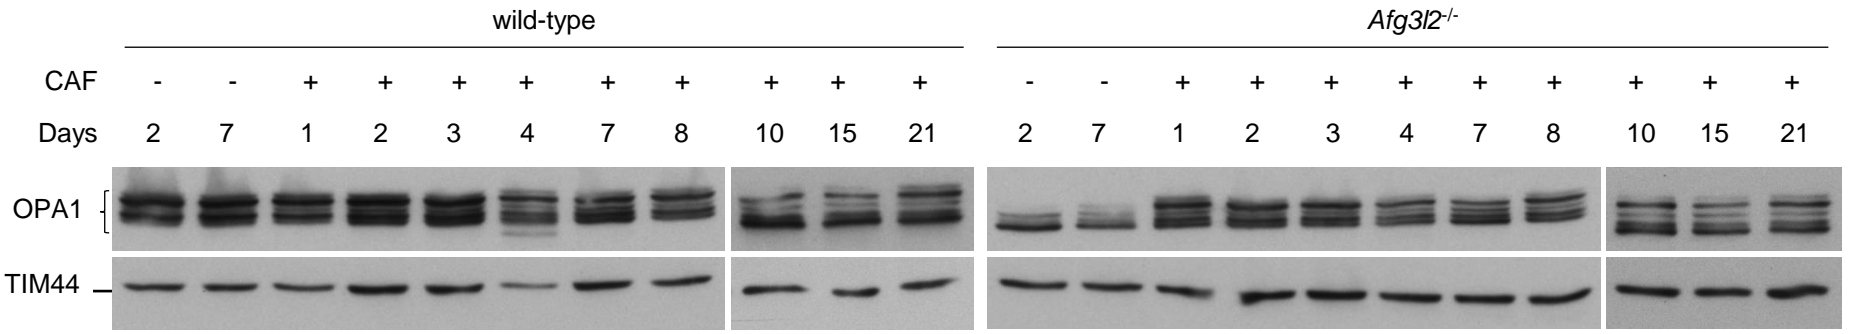

**B**

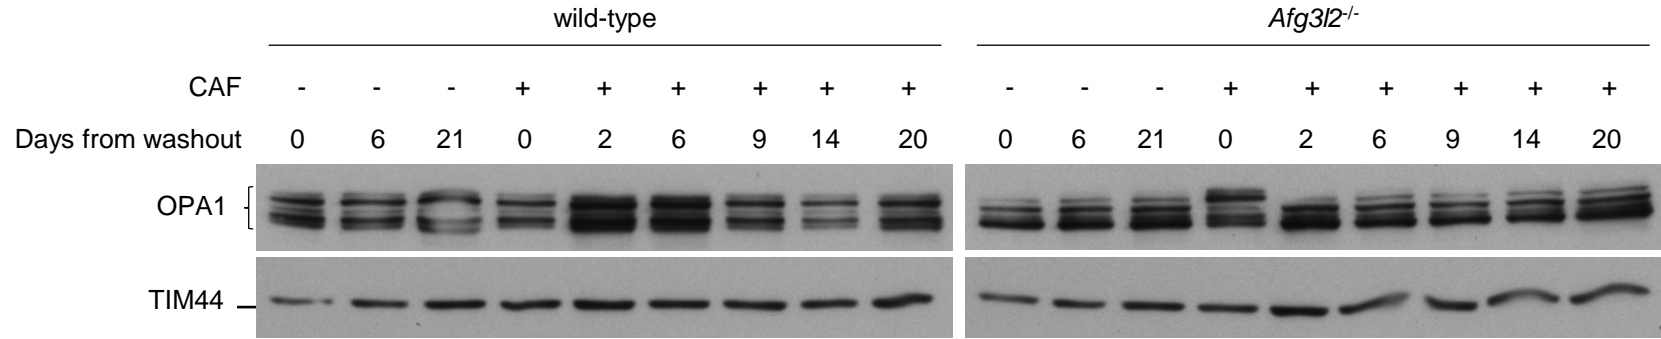

**C**

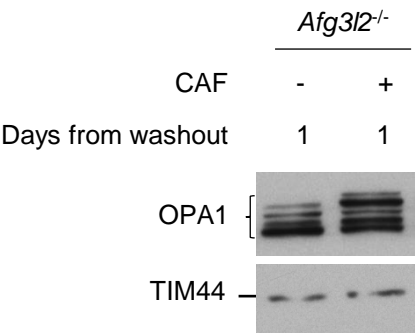

Supplement: jmedgenet-2018-105766supp001.pdf [file jmedgenet-2018-105766supp001.pdf]
